# Supplementary material for: Structural basis for assembly and function of the Nup82 complex in the nuclear pore scaffold
Source: PubMed Central journal article supplement — J Cell Biol. 2015 Feb 2;208(3):283–97. doi: 10.1083/jcb.201411003 (PMC4315244; doi:10.1083/jcb.201411003), 2015-02-02
Supplement: supp_jcb.201411003_JCB_201411003_sm.pdf [file supp_jcb.201411003_JCB_201411003_sm.pdf]

Gaik et al., <http://www.jcb.org/content/full/jcb.2014.11003/DC1>

Nup159-CTD

Multiple sequence alignment of Nup159-CTD from various species, including H2A, H2B, H3, and H4. The alignment shows conserved residues across different species and domains.

Linker

H1

Multiple sequence alignment of Linker and H1 domains. The alignment shows conserved residues across different species and domains.

H2

Multiple sequence alignment of H2 domain. The alignment shows conserved residues across different species and domains.

H3

H4

Multiple sequence alignment of H3 and H4 domains. The alignment shows conserved residues across different species and domains.

H4

Multiple sequence alignment of H4 domain. The alignment shows conserved residues across different species and domains.

tail

Multiple sequence alignment of tail domain. The alignment shows conserved residues across different species and domains.

Figure S1.  $\alpha$ -Helically predicted domain of Nup159 are conserved among fungi. Multi-sequence alignment, using T-Coffee (<http://www.ebi.ac.uk/Tools/msa/tcoffee/>), and Jalview, of the  $\alpha$ -helically predicted C domain of Nup159. The default color scheme of ClustalX/Jalview was used with e.g., hydrophobic residues in blue, acidic residues in violet, and basic residues in red.

THE JOURNAL OF CELL BIOLOGY

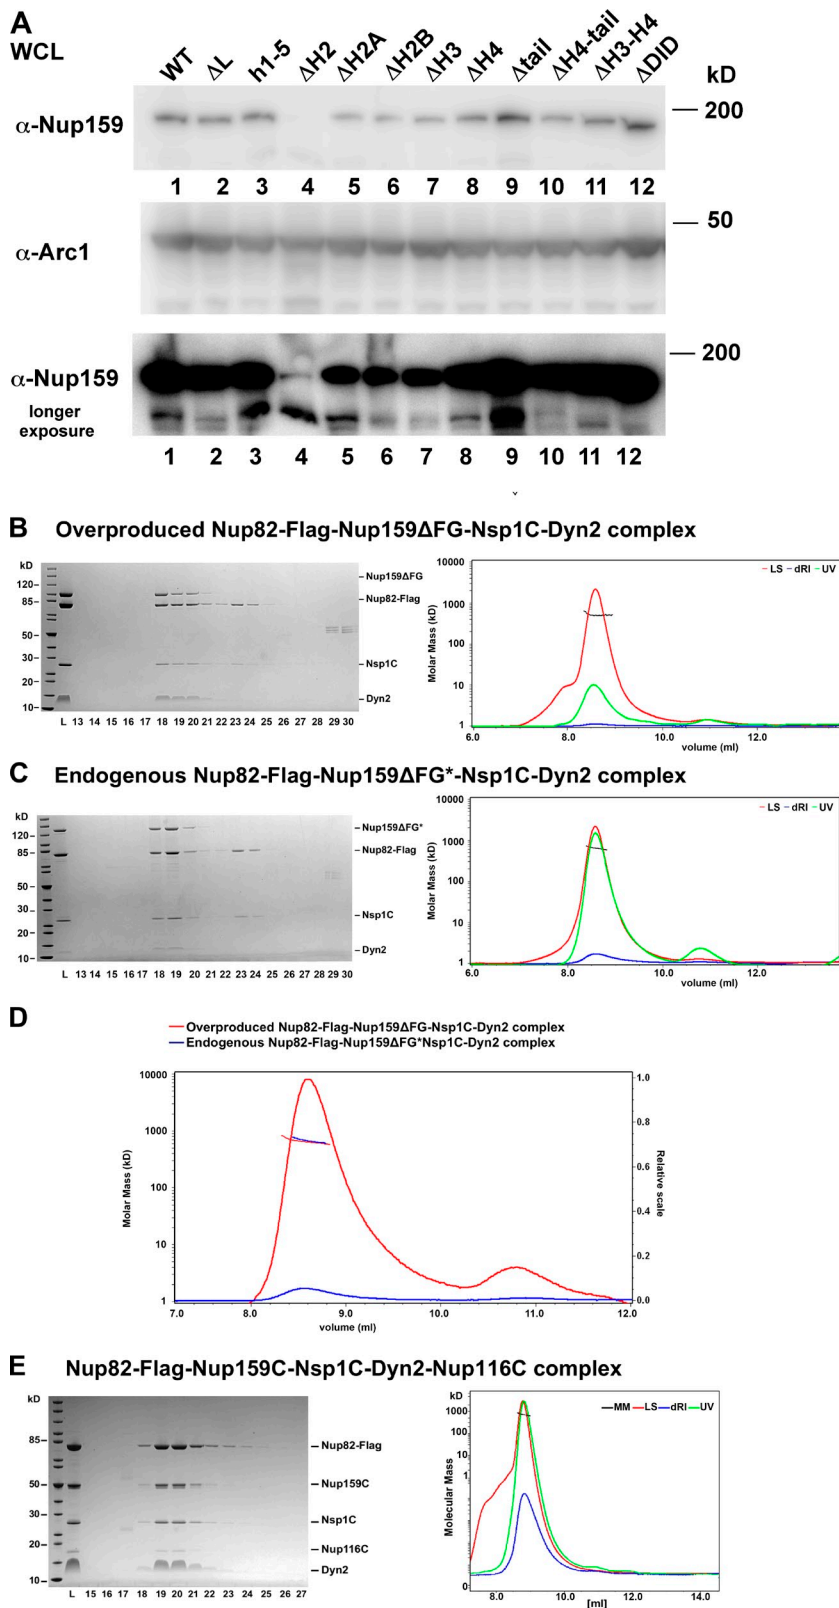

Figure S2. **Overproduced and endogenous Nup82-Nup159 $\Delta$ FG-Nsp1C-Dyn2 complexes have a similar gel filtration behavior and a related MALS value.** (A) Expression levels of the indicated Nup159 wild-type (WT) and mutant proteins used in this study, which were analyzed by SDS-PAGE of whole-cell lysates (WCL; cells were grown at 30°C) followed by Western blotting using a monoclonal anti-Nup159 antibody (mAB165C10), which allows detection of the Nup159 CTD constructs (Kraemer et al., 1995), and as loading control, we used anti-Arc1 antibodies. (B) SEC-MALS analysis of the overproduced Nup82-Flag-Nup159 $\Delta$ FG-Nsp1C-Dyn2 complex with a deduced molecular mass of 632 kD. (C) SEC-MALS analysis of the endogenous Nup82-Flag-Nup159 $\Delta$ FG\*-Nsp1C-Dyn2 complex (indicated a molecular mass of 670 kD). The asterisk in Nup159 $\Delta$ FG\* indicates that Nup159 carries additional amino acids between the  $\beta$ -propeller domain and the DID (see Tables S1 and S2). (D) Comparison of yield of overproduced versus endogenous Nup82-Flag-Nup159 $\Delta$ FG-Nsp1C-Dyn2 complex, as indicated by the differential refractive index (dRI). LS, light scattering; MM, molecular mass. (E) SEC-MALS analysis of the Nup82-Flag-Nup159C-Nsp1C-Dyn2-Nup116C complex (deduced molecular mass 693 kD). In A–D, data shown are from single representative experiments out of two repeats. L, load.

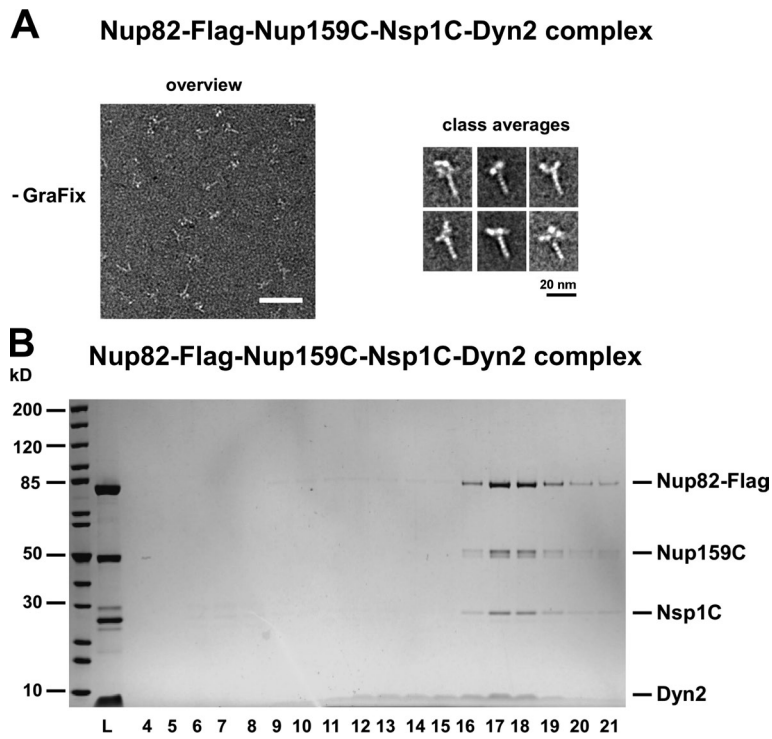

Figure S3. **Negative-staining EM analysis of the unfixed and GraFix-treated Nup82-Nup159C-Nsp1C-Dyn2 complex.** (A) Negative-staining EM of the unfixed Nup82-Nup159C-Nsp1C-Dyn2 complex showing an overview picture (left) and a gallery of class averages (right). Bar, 50 nm. (B) Glycerol gradient centrifugation of affinity-purified mNup82-Nup159C-Nsp1C-Dyn2 complex, analyzed by SDS-PAGE and Coomassie staining, to determine the relevant fractions (17-18) of glycerol-glutaraldehyde (GraFix) gradient used in the EM analysis (Fig. 4 A). L, load.

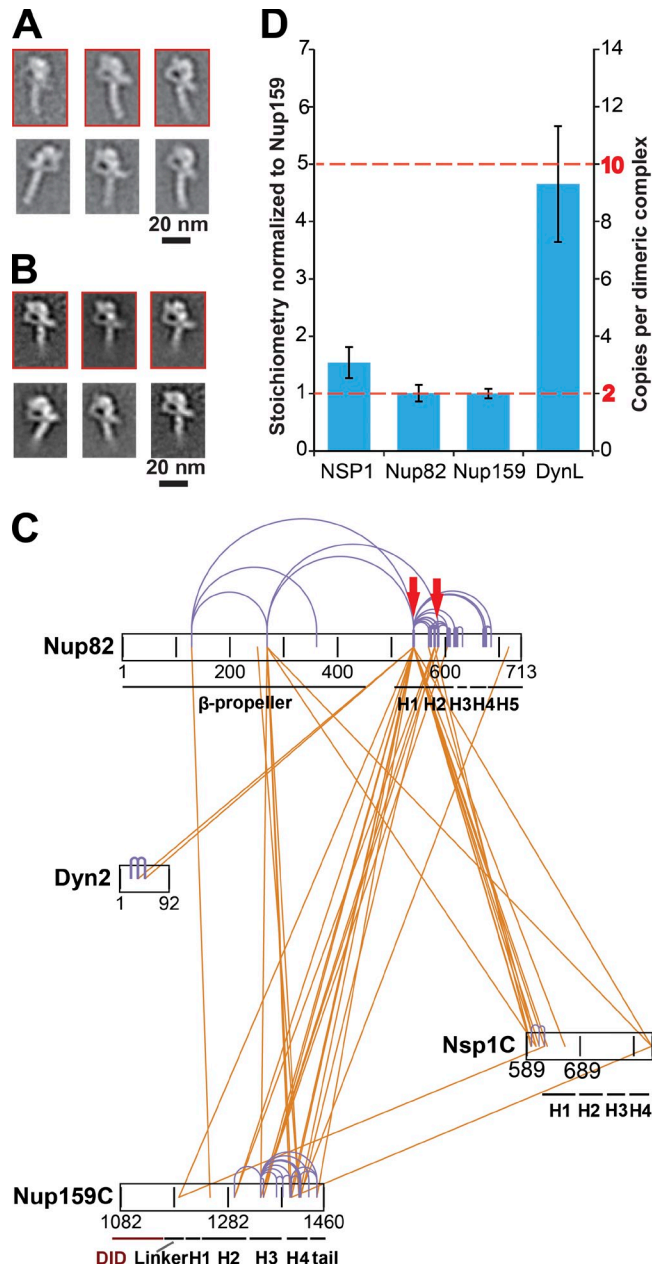

Figure S4. **EM structure, cross-linking, and stoichiometry of the purified Nup82 complex.** (A) Representative 2D class averages of affinity-purified Nup82–Nup159C–Nsp1C–Dyn2 complex based on subtomogram averaging. Parts of the DID<sub>Nup159</sub>–Dyn2 stalk are averaged out in the first and the third class. Highlighted classes (red) were used for 3D reconstruction (B) Representative class averages of the affinity-purified Nup82–Nup159C–Nsp1C–Dyn2 complex based on subtomogram averaging focused by local masking to the head region such that it is resolved with higher detail. Highlighted classes (red) were used for 3D reconstruction. (C) XL-MS of the affinity-purified Nup82–Nup159C–Nsp1C–Dyn2 complex using DSG. The primary structure of the protein is shown, and specific regions are indicated. Interprotein cross-links are shown in orange; intraprotein cross-links are in purple. For the visualization of cross-links, the xiNET tool from the Rappsilber laboratory was used (<http://crosslinkviewer.org/index.php>). Because multiple copies of each protein are present, the latter might also occur across multiple instances of the same protein. Homodimeric cross-links that connect the two instances of the same lysine residue are indicated with red arrows. (D) Stoichiometric measurements of purified Nup82–Nup159C–Nsp1C–Dyn2 complex by quantitative, targeted proteomics within an early fraction of the gel filtration peak. Two heavy-labeled reference peptides per protein were used as intrinsic standards. The apparent values were normalized to the abundance of Nup159; error bars correspond to one standard deviation (Fig. 7).

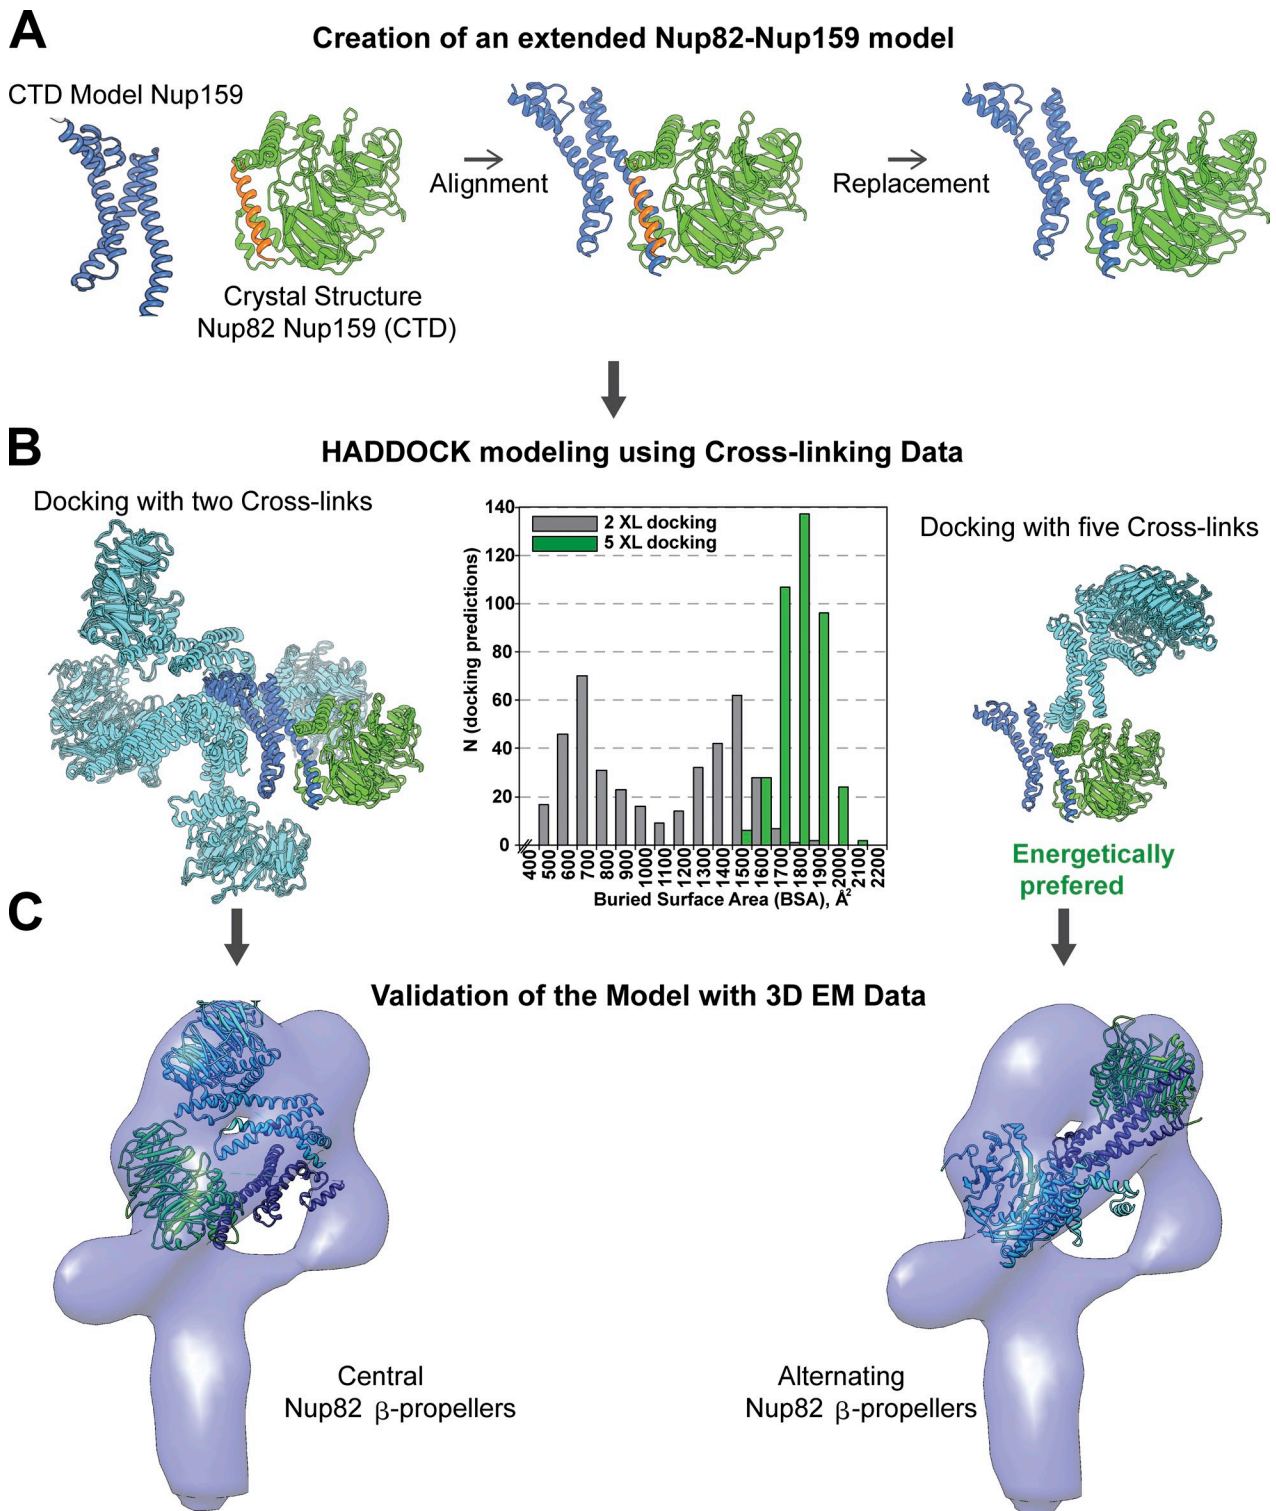

Figure S5. **Structural modeling of the interaction between Nup82 and Nup159.** (A) A structural model of Nup159C (amino acids 1,313–1,434) was generated using I-TASSER. An extended Nup82–Nup159 structural model was built after superposition on top of Nup82, present in the Nup159-Nup116 x-ray structure. The model was further refined using HADDOCK. (B) Interaction of four Nup82 propellers and two Nup159C domains (from amino acids 1,313 to 1,434) were modeled using docking by translating XL-MS information into spatial restraints as implemented in HADDOCK. When only homodimeric spatial restraints (Nup159 K1343 and Nup159 K1414) were considered (left), the approach did not converge into a single solution. When three additional distance restraints were considered (Nup82 K269 with Nup159 K1343, Nup82 K269 with Nup159 K1414, and Nup82 K274 with Nup159 K1343) under the assumption that they occur across two relevant instances of Nup82 and Nup159, an energetically favorable model was generated. (C) Structural models that satisfy the EM volume are shown. The right model is energetically preferred as highlighted in plot in B, showing that calculated buried surface area is much larger compared with the model on the left.

Table S1. **Plasmids used in this study**

| Plasmid                                               | Markers and construction details                                                         | Reference               |
|-------------------------------------------------------|------------------------------------------------------------------------------------------|-------------------------|
| pRS414-NUP159                                         | CEN, TRP1, AmpR, P <sub>NUP159</sub> NUP159, T <sub>ADH1</sub>                           | Stelter et al., 2007    |
| pRS414-nup159ΔDID                                     | See above, P <sub>NUP159</sub> Nup159 ΔΔ1,086–1,185 aa                                   | Stelter et al., 2007    |
| pRS414-nup159ΔLinker                                  | See above, P <sub>NUP159</sub> Nup159 ΔΔ1,179–1,210 aa                                   | This study              |
| pRS414-nup159ΔH1                                      | See above, P <sub>NUP159</sub> Nup159 ΔΔ1,210–1,244 aa                                   | This study              |
| pRS414-nup159ΔH2                                      | See above, P <sub>NUP159</sub> Nup159 ΔΔ1,245–1,330 aa                                   | This study              |
| pRS414-nup159ΔH3                                      | See above, P <sub>NUP159</sub> Nup159 ΔΔ1,330–1,381 aa                                   | This study              |
| pRS414-nup159ΔH4                                      | See above, P <sub>NUP159</sub> Nup159 ΔΔ1,381–1,425 aa                                   | This study              |
| pRS414-nup159Δtail                                    | See above, P <sub>NUP159</sub> Nup159 ΔΔ1,425–1,460 aa                                   | This study              |
| pRS414-nup159ΔH3-H4                                   | See above, P <sub>NUP159</sub> Nup159 ΔΔ1,330–1,425 aa                                   | This study              |
| pRS414-nup159ΔH4-tail                                 | See above, P <sub>NUP159</sub> Nup159 ΔΔ1,381–1,460 aa                                   | This study              |
| pRS414-nup159 h1-5                                    | See above, P <sub>NUP159</sub> Nup159 Δ I1232>D,M1235>E                                  | This study              |
| pRS414-GFP-NUP159                                     | CEN, TRP1, AmpR, P <sub>NOP1</sub> NUP159, T <sub>ADH1</sub>                             | This study              |
| pRS414-GFP-nup159 h1-5                                | CEN, TRP1, AmpR, P <sub>NOP1</sub> nup159h1-5, T <sub>ADH1</sub>                         | This study              |
| pRS414-NUP159-Flag-TEV-ProtA                          | CEN, TRP1, AmpR, P <sub>NOP1</sub> NUP159-FLAG-TEV-pA, T <sub>ADH1</sub>                 | This study              |
| pRS414-Nup159-h1-5-Flag-TEV-ProtA                     | CEN, TRP1, AmpR, P <sub>NOP1</sub> nup159h1-5-FLAG-TEV-pA, T <sub>ADH1</sub>             | This study              |
| YEplac181-NUP159                                      | 2μ, LEU2, AmpR, P <sub>GAL1-10</sub> NUP159 T <sub>ADH1</sub>                            | This study              |
| YEplac181-Nup159ΔFG                                   | 2μ, LEU2, AmpR, P <sub>GAL1-10</sub> NUP159 ΔΔ459–1,083 aa T <sub>ADH1</sub>             | This study              |
| YEplac181-Nup159C                                     | 2μ, LEU2, AmpR, P <sub>GAL1-10</sub> NUP159 ΔΔ1–1,082 aa, T <sub>ADH1</sub>              | This study              |
| Yep351-GAL1-Dyn2                                      | 2μ, LEU2, AmpR, P <sub>GAL1-10</sub> DYN2, T <sub>ADH1</sub>                             | This study              |
| YEplac195-P1GAL-Dyn2-P2-Nup159C                       | YEplac195-P1 <sub>GAL1-10</sub> -DYN2-P2-NUP159 ΔΔ1–1,082 aa, URA3                       | This study              |
| YEplac181-P1GAL-Nsp1C-P2-Nup82-Flag-TEV-ProtA         | YEplac181-P1 <sub>GAL1-10</sub> -NSP1 ΔΔ1–572 aa-P2-NUP82-FLAG-TEV-pA, LEU2              | This study              |
| YEplac195-P1GAL-Dyn2-P2-Nup159Δtail                   | YEplac195-P1 <sub>GAL1-10</sub> -DYN2-P2-NUP159 ΔΔ1–1,082 aa and 1,425–1,460 aa, URA3    | This study              |
| YEplac195-P1GAL-Dyn2-P2-Nup159ΔFG                     | YEplac195-P1 <sub>GAL1-10</sub> -DYN2-P2-NUP159 ΔΔ459–1,083 aa, URA3                     | This study              |
| YEplac181-P1GAL-HIS-Nup116C                           | YEplac181-P1 <sub>GAL1-10</sub> -NUP116 ΔΔ1–967 aa, LEU2                                 | This study              |
| YEplac181-P1GAL-Nsp1C-Flag-TEV-ProtA-P2-Nup82         | YEplac181-P1 <sub>GAL1-10</sub> -NSP1 ΔΔ1–572 aa-FLAG-TEV-pA-P2-NUP82, LEU2              | This study              |
| YEplac195-P1GAL-Dyn2-P2-Nup159tail-Flag               | YEplac195-P1 <sub>GAL1-10</sub> -DYN2-P2-NUP159 ΔΔ1–1,425 aa-FLAG, URA3                  | This study              |
| YEplac112-P1GAL-Nsp1C-P2-Nup82-Flag-TEV-ProtA         | YEplac112-P1 <sub>GAL1-10</sub> -NSP1 ΔΔ1–572 aa-P2-NUP82-FLAG-TEV-pA, TRP1              | This study              |
| YEplac112-P1GAL-Nsp1C-P2-Nup82-TEV-ProtA              | YEplac112-P1 <sub>GAL1-10</sub> -NSP1 ΔΔ1–572 aa-P2-NUP82-TEV-pA, TRP1                   | This study              |
| pET-15b-HIS-TEV-Nup159-QT <sub>4-5</sub> -Linker-H1   | KanR, P <sub>T7</sub> HIS <sub>6</sub> -TEV-nup159-1,153–1,241 aa                        | This study              |
| pET-15b-HIS-TEV-Nup159-QT <sub>4-5</sub> -Linker-h1-5 | KanR, P <sub>T7</sub> HIS <sub>6</sub> -TEV-nup159-1,153–1,241 aa I1232>D,M1235>E        | This study              |
| pRS414-ADHI-NSP1C                                     | CEN, TRP1, AmpR, P <sub>ADH1</sub> NSP1-ΔΔ 1-605 aa, T <sub>ADH1</sub>                   | Nehrbass et al., 1990   |
| pAM1 (Nup159ΔFG*)                                     | CEN4, LEU2, AmpR, YCplac111 (Δ[HindIII-SmaI]) containing the RAT7-ΔRp/NUP159 gene [pLG7] | Del Priore et al., 1997 |

Table S2. **Yeast strains used in this study**

| Strain                                       | Genotype                                                                                                                     | Reference           |
|----------------------------------------------|------------------------------------------------------------------------------------------------------------------------------|---------------------|
| Ds1-2b                                       | his3-Δ200, leu2-Δ1, trp1-Δ63, ura3-52, MAT α                                                                                 | Grandi et al., 1995 |
| Nup159Δ shuffle                              | nup159::natNT2, his3-Δ200, ura3-52, leu2-Δ1, trp1-Δ63, MAT α, pLG-URA3-NUP159                                                | Gorsch et al., 1995 |
| Nup159Δ shuffle, Nup82-Flag-TEV-ProtA        | nup159::natNT2, his3-Δ200, ura3-52, leu2-Δ1, trp1-Δ63, MAT α, Nup82-Flag-TEV-ProtA::HIS3, pLG-URA3-NUP159                    | This study          |
| Nup82-Flag-TEV-ProtA, Nup159Δ, Nsp1Δ shuffle | nup159::HIS3, nsp1::HIS3, ura3-52, leu2-Δ1, trp1-Δ63, MAT α, Nup82-Flag-TEV-ProtA::natNT2, pLG-URA3-NUP159, pRS316-URA3-NSP1 | This study          |

Table S3. **Cross-links identified within the Nup82 complex using DSS**

| Peptide                                                      | Protein 1 | Protein 2 | AA 1  | AA 2  | Id score | Comment                                        |
|--------------------------------------------------------------|-----------|-----------|-------|-------|----------|------------------------------------------------|
| KINSWDQVLV-KMLEIDSK                                          | Nsp1      | Nup82     | 661   | 685   | 37.2     |                                                |
| IVKAQTLGVSIHNR-TEESSTGKSTADV                                 | Nup82     | Nsp1      | 541   | 607   | 35.5     |                                                |
| IVKAQTLGVSIHNR-K <sup>+</sup> TEESSTGKSTADV                  | Nup82     | Nsp1      | 541   | 607   | 36.0     | Missed-cleavage derivative to previous peptide |
| QINSIKK-MQKTL                                                | Nsp1      | Nup159    | 822   | 1,343 | 31.1     |                                                |
| SLDDNSTSLEKQINSIK-MQKTLR                                     | Nsp1      | Nup159    | 816   | 1,343 | 31.5     |                                                |
| SLDDNSTSLEKQINSIK <sup>+</sup> -K-MQKTLR                     | Nsp1      | Nup159    | 816   | 1,343 | 32.3     | Missed-cleavage derivative to previous peptide |
| FGKVDIQK-MQKTLR                                              | Nup82     | Nup159    | 269   | 1,343 | 45.3     | Restraint used for modeling                    |
| FGKVDIQK <sup>+</sup> EYR-MQKTLR                             | Nup82     | Nup159    | 269   | 1,343 | 39.3     | Missed-cleavage derivative to previous peptide |
| FGKVDIQKEYR-MQKTLR                                           | Nup82     | Nup159    | 274   | 1,343 | 32.8     | Restraint used for modeling                    |
| FGKVDIQK-LQLEEKGGK                                           | Nup82     | Nup159    | 269   | 1,414 | 37.2     | Restraint used for modeling                    |
| FGKVDIQK-LQLEEKGGK <sup>+</sup>                              | Nup82     | Nup159    | 269   | 1,414 | 37.5     | Missed-cleavage derivative to previous peptide |
| IEAETIKVDKK-LFTVKNK                                          | Nup82     | Nup159    | 674   | 1,372 | 24.7     |                                                |
| IEAETIKVDKK-MQKTLR                                           | Nup82     | Nup159    | 671   | 1,343 | 36.7     |                                                |
| IISKDDDLRR-MQKTLR                                            | Nup82     | Nup159    | 573   | 1,343 | 29.7     |                                                |
| QLQSTCK <sup>+</sup> IISKDDDLR-MQKTLR                        | Nup82     | Nup159    | 573   | 1,343 | 25.3     | Missed-cleavage derivative to previous peptide |
| IVKAQTLGVSIHNR-DALDKYQLER                                    | Nup82     | Dyn2      | 541   | 34    | 40.4     |                                                |
| IVKAQTLGVSIHNR-DGLLKEIK                                      | Nup82     | Nup159    | 541   | 1,397 | 34.8     |                                                |
| IVKAQTLGVSIHNR-DIAGTVKK                                      | Nup82     | Dyn2      | 541   | 46    | 31.2     |                                                |
| IVKAQTLGVSIHNR-DNEKTEESSTGK                                  | Nup82     | Nsp1      | 541   | 598   | 36.3     |                                                |
| IVKAQTLGVSIHNR-EIKLLR                                        | Nup82     | Nup159    | 541   | 1,400 | 35.3     |                                                |
| IVKAQTLGVSIHNR-EKVTDYVR                                      | Nup82     | Nup159    | 541   | 1,294 | 32.9     |                                                |
| IVKAQTLGVSIHNR-KINSWDQVLV                                    | Nup82     | Nsp1      | 541   | 661   | 36.9     |                                                |
| IVKAQTLGVSIHNR-KTEESSTGK                                     | Nup82     | Nsp1      | 541   | 599   | 38.8     |                                                |
| IVKAQTLGVSIHNR-LQLEEKGGK                                     | Nup82     | Nup159    | 541   | 1,414 | 37.6     |                                                |
| IVKAQTLGVSIHNR-LQLEEKGGK <sup>+</sup>                        | Nup82     | Nup159    | 541   | 1,414 | 26.0     | Missed-cleavage derivative to previous peptide |
| IVKAQTLGVSIHNR-MQKTLR                                        | Nup82     | Nup159    | 541   | 1,343 | 42.9     |                                                |
| IVKAQTLGVSIHNR-QINSIKK                                       | Nup82     | Nsp1      | 541   | 822   | 32.0     |                                                |
| IVKAQTLGVSIHNR-QLKEYYTSK                                     | Nup82     | Nup159    | 541   | 1,191 | 34.9     |                                                |
| IVKAQTLGVSIHNR-STADV <sup>+</sup> KSSDSLK                    | Nup82     | Nsp1      | 541   | 613   | 39.3     |                                                |
| KFEAQNK-MQKTLR                                               | Nup82     | Nup159    | 580   | 1,343 | 36.1     |                                                |
| KFEAQNK <sup>+</sup> -K-MQKTLR                               | Nup82     | Nup159    | 580   | 1,343 | 33.1     | Missed-cleavage derivative to previous peptide |
| KFEAQNK-MQKTLR                                               | Nup82     | Nup159    | 586   | 1,343 | 34.3     |                                                |
| KMLEIDSK-MQKTLR                                              | Nup82     | Nup159    | 685   | 1,343 | 39.5     |                                                |
| KWDAQLSR-LQLEEKGGK                                           | Nup82     | Nup159    | 587   | 1,414 | 27.4     |                                                |
| KWDAQLSR-MQKTLR                                              | Nup82     | Nup159    | 587   | 1,343 | 42.5     |                                                |
| MLEIDSKIIK-EIKLLR                                            | Nup82     | Nup159    | 692   | 1,400 | 37.7     |                                                |
| QLQSTCKIISK-MQKTLR                                           | Nup82     | Nup159    | 569   | 1,343 | 31.4     |                                                |
| QLQSTCKIISK <sup>+</sup> DDDLR-MQKTLR                        | Nup82     | Nup159    | 569   | 1,343 | 26.7     | Missed-cleavage derivative to previous peptide |
| TQGSYDKDHGDYKDDDDK-MQKTLR                                    | Nup82     | Nup159    | 718   | 1,343 | 27.1     |                                                |
| EKVTDYVRK-KFEAQNK                                            | Nup159    | Nup82     | 1,294 | 586   | 29.4     |                                                |
| EYYTSK <sup>+</sup> SNIPFVSQNSTLR-STADV <sup>+</sup> KSSDSLK | Nup159    | Nsp1      | 1,198 | 613   | 24.8     |                                                |
| NMDTFFTDQSSIPV <sup>+</sup> KR-IVKAQTLGVSIHNR                | Nup159    | Nup82     | 1,249 | 541   | 34.4     |                                                |
| NMDTFFTDQSSIPV <sup>+</sup> KR-KFEAQNK                       | Nup159    | Nup82     | 1,249 | 580   | 25.3     |                                                |
| NMDTFFTDQSSIPV <sup>+</sup> KR-KFEAQNK <sup>+</sup>          | Nup159    | Nup82     | 1,249 | 580   | 26.3     | Missed-cleavage derivative to previous peptide |
| DALDKYQLER-DIAGTVKK                                          | Dyn2      |           | 34    | 46    | 29.7     |                                                |
| DALDKYQLER-DIAGTVKK <sup>+</sup> QLDVK                       | Dyn2      |           | 34    | 46    | 33.6     | Missed-cleavage derivative to previous peptide |
| DALDKYQLER-KQLDVK                                            | Dyn2      |           | 34    | 47    | 41.2     |                                                |
| DALDKYQLER <sup>+</sup> -DIAGTVK-KQLDVK                      | Dyn2      |           | 34    | 47    | 38.3     | Missed-cleavage derivative to previous peptide |
| DALDKYQLER-LKEDILTISK                                        | Dyn2      |           | 34    | 21    | 40.7     |                                                |

Table S3. **Cross-links identified within the Nup82 complex using DSS** (Continued)

| Peptide                                                                                                                                                 | Protein 1 | Protein 2 | AA 1  | AA 2  | ld score | Comment                                                   |
|---------------------------------------------------------------------------------------------------------------------------------------------------------|-----------|-----------|-------|-------|----------|-----------------------------------------------------------|
| DNEK <b>K</b> TEESSTGK-KTEESSTGK                                                                                                                        | Nsp1      |           | 598   | 599   | 25.2     |                                                           |
| DNEK <b>K</b> TEESSTGK-STADV <b>K</b> SSDSLK                                                                                                            | Nsp1      |           | 598   | 613   | 25.0     |                                                           |
| STADV <b>K</b> SSDSLK-KTEESSTGK                                                                                                                         | Nsp1      |           | 613   | 599   | 38.0     |                                                           |
| STADV <b>K</b> SSDSLK-DNEK <b>K</b> TEESSTGK                                                                                                            | Nsp1      |           | 613   | 599   | 33.5     | Missed-cleavage derivative to previous peptide            |
| KTEESSTG <b>K</b> STADV <b>K</b> -KTEESSTGK                                                                                                             | Nsp1      |           | 607   | 599   | 27.7     |                                                           |
| KTEESSTG <b>K</b> STADV <b>K</b> -MGAQ <b>K</b> DNEK                                                                                                    | Nsp1      |           | 607   | 594   | 28.5     |                                                           |
| LNS <b>K</b> PVELKPVSLDNK-STADV <b>K</b> SSDSLK                                                                                                         | Nsp1      |           | 623   | 613   | 33.1     |                                                           |
| NMDTFFTDQSSIP <b>V</b> KR-MQ <b>K</b> TLR                                                                                                               | Nup159    |           | 1,249 | 1,343 | 24.6     |                                                           |
| E <b>K</b> VTDYVR-MQ <b>K</b> TLR                                                                                                                       | Nup159    |           | 1,294 | 1,343 | 33.7     |                                                           |
| MQ <b>K</b> TLR-MQ <b>K</b> TLR                                                                                                                         | Nup159    |           | 1,343 | 1,343 | 37.5     | Homodimeric peptide topology; restraint used for modeling |
| Q <b>K</b> LFDVSAK-MQ <b>K</b> TLR                                                                                                                      | Nup159    |           | 1,348 | 1,343 | 41.2     |                                                           |
| LDDNPLV <b>A</b> KLAK-DGL <b>L</b> KEIK                                                                                                                 | Nup159    |           | 1,384 | 1,397 | 42.2     |                                                           |
| LDDNPLV <b>A</b> KLAK-EI <b>K</b> LLR                                                                                                                   | Nup159    |           | 1,384 | 1,400 | 33.8     |                                                           |
| LDDNPLV <b>A</b> KLAK-LQLEEK <b>G</b> K                                                                                                                 | Nup159    |           | 1,384 | 1,414 | 31.5     |                                                           |
| LDDNPLV <b>A</b> KLAK-MQ <b>K</b> TLR                                                                                                                   | Nup159    |           | 1,384 | 1,343 | 32.7     |                                                           |
| DGL <b>L</b> KEIK-EI <b>K</b> LLR                                                                                                                       | Nup159    |           | 1,397 | 1,400 | 35.0     |                                                           |
| DGL <b>L</b> KEIK-LQLEEK <b>G</b> K                                                                                                                     | Nup159    |           | 1,397 | 1,414 | 38.8     |                                                           |
| DGL <b>L</b> KEIK-MQ <b>K</b> TLR                                                                                                                       | Nup159    |           | 1,397 | 1,343 | 36.8     |                                                           |
| EI <b>K</b> LLR-MQ <b>K</b> TLR                                                                                                                         | Nup159    |           | 1,400 | 1,343 | 29.6     |                                                           |
| LQLEEK <b>G</b> K-DM <b>K</b> G <b>F</b> K                                                                                                              | Nup159    |           | 1,414 | 1,432 | 38.5     |                                                           |
| LQLEEK <b>G</b> K-EI <b>K</b> LLR                                                                                                                       | Nup159    |           | 1,414 | 1,400 | 36.0     |                                                           |
| LQLEEK <b>G</b> K <b>K</b> -EI <b>K</b> LLR                                                                                                             | Nup159    |           | 1,414 | 1,400 | 31.5     | Missed-cleavage derivative to previous peptide            |
| LQLEEK <b>G</b> K-LQLEEK <b>G</b> K                                                                                                                     | Nup159    |           | 1,414 | 1,414 | 35.8     | Homodimeric peptide topology; restraint used for modeling |
| LQLEEK <b>G</b> K <b>K</b> -LQLEEK <b>G</b> K                                                                                                           | Nup159    |           | 1,414 | 1,414 | 38.2     | Missed-cleavage derivative to previous peptide            |
| LQLEEK <b>G</b> K <b>K</b> -LQLEEK <b>G</b> K <b>K</b>                                                                                                  | Nup159    |           | 1,414 | 1,414 | 35.7     | Missed-cleavage derivative to previous peptide            |
| LQLEEK <b>G</b> K-MQ <b>K</b> TLR                                                                                                                       | Nup159    |           | 1,414 | 1,343 | 44.4     |                                                           |
| LQLEEK <b>G</b> K <b>K</b> -MQ <b>K</b> TLR                                                                                                             | Nup159    |           | 1,414 | 1,343 | 36.5     | Missed-cleavage derivative to previous peptide            |
| LQLEEK <b>G</b> K <b>K</b> -Q <b>K</b> LFDVSAK                                                                                                          | Nup159    |           | 1,414 | 1,348 | 24.8     |                                                           |
| LQLEEK <b>G</b> K-LFT <b>V</b> KNK                                                                                                                      | Nup159    |           | 1,414 | 1,372 | 30.4     |                                                           |
| LQLEEK <b>G</b> K <b>K</b> -MQ <b>K</b> TLR                                                                                                             | Nup159    |           | 1,416 | 1,343 | 31.5     |                                                           |
| <b>K</b> ASSFDASSSIT <b>K</b> -LQLEEK <b>G</b> K                                                                                                        | Nup159    |           | 1,417 | 1,414 | 46.4     |                                                           |
| <b>K</b> ASSFDASSSIT <b>K</b> -LQLEEK <b>G</b> K <b>K</b>                                                                                               | Nup159    |           | 1,417 | 1,416 | 29.3     |                                                           |
| <b>K</b> ASSFDASSSIT <b>K</b> -MQ <b>K</b> TLR                                                                                                          | Nup159    |           | 1,417 | 1,343 | 35.7     |                                                           |
| ASSFDASSSIT <b>K</b> DM <b>K</b> -LQLEEK <b>G</b> K                                                                                                     | Nup159    |           | 1,429 | 1,414 | 27.7     |                                                           |
| DM <b>K</b> G <b>F</b> K-MQ <b>K</b> TLR                                                                                                                | Nup159    |           | 1,432 | 1,343 | 28.0     |                                                           |
| <b>K</b> QIGDFF <b>K</b> -LQLEEK <b>G</b> K                                                                                                             | Nup159    |           | 1,447 | 1,414 | 32.9     |                                                           |
| FG <b>K</b> V <b>D</b> I <b>Q</b> K- <b>K</b> F <b>E</b> A <b>Q</b> N <b>K</b>                                                                          | Nup82     |           | 269   | 580   | 26.1     |                                                           |
| FG <b>K</b> V <b>D</b> I <b>Q</b> K- <b>K</b> W <b>D</b> A <b>Q</b> L <b>S</b> R                                                                        | Nup82     |           | 269   | 587   | 28.0     |                                                           |
| IV <b>K</b> A <b>Q</b> T <b>L</b> G <b>V</b> SI <b>H</b> N <b>R</b> -FG <b>K</b> V <b>D</b> I <b>Q</b> K                                                | Nup82     |           | 541   | 269   | 35.5     |                                                           |
| IV <b>K</b> A <b>Q</b> T <b>L</b> G <b>V</b> SI <b>H</b> N <b>R</b> -FS <b>K</b> L <b>S</b> K                                                           | Nup82     |           | 541   | 604   | 39.7     |                                                           |
| IV <b>K</b> A <b>Q</b> T <b>L</b> G <b>V</b> SI <b>H</b> N <b>R</b> -IE <b>A</b> ET <b>I</b> K <b>V</b> D <b>K</b> K                                    | Nup82     |           | 541   | 674   | 35.1     |                                                           |
| IV <b>K</b> A <b>Q</b> T <b>L</b> G <b>V</b> SI <b>H</b> N <b>R</b> -I <b>S</b> K <b>D</b> D <b>D</b> L <b>R</b> R                                      | Nup82     |           | 541   | 573   | 35.9     |                                                           |
| IV <b>K</b> A <b>Q</b> T <b>L</b> G <b>V</b> SI <b>H</b> N <b>R</b> -IV <b>K</b> A <b>Q</b> T <b>L</b> G <b>V</b> SI <b>H</b> N <b>R</b>                | Nup82     |           | 541   | 541   | 39.7     | Homodimeric peptide topology                              |
| IV <b>K</b> A <b>Q</b> T <b>L</b> G <b>V</b> SI <b>H</b> N <b>R</b> - <b>K</b> F <b>E</b> A <b>Q</b> N <b>K</b>                                         | Nup82     |           | 541   | 580   | 43.1     |                                                           |
| IV <b>K</b> A <b>Q</b> T <b>L</b> G <b>V</b> SI <b>H</b> N <b>R</b> - <b>K</b> F <b>E</b> A <b>Q</b> N <b>K</b> <b>K</b>                                | Nup82     |           | 541   | 586   | 35.5     |                                                           |
| IV <b>K</b> A <b>Q</b> T <b>L</b> G <b>V</b> SI <b>H</b> N <b>R</b> - <b>K</b> M <b>L</b> E <b>I</b> D <b>S</b> K                                       | Nup82     |           | 541   | 685   | 43.9     |                                                           |
| IV <b>K</b> A <b>Q</b> T <b>L</b> G <b>V</b> SI <b>H</b> N <b>R</b> - <b>K</b> S <b>Q</b> N <b>E</b> W <b>D</b> E <b>L</b> R                            | Nup82     |           | 541   | 675   | 35.2     |                                                           |
| IV <b>K</b> A <b>Q</b> T <b>L</b> G <b>V</b> SI <b>H</b> N <b>R</b> - <b>K</b> S <b>Q</b> N <b>E</b> W <b>D</b> E <b>L</b> R <b>K</b>                   | Nup82     |           | 541   | 675   | 27.4     | Missed-cleavage derivative to previous peptide            |
| IV <b>K</b> A <b>Q</b> T <b>L</b> G <b>V</b> SI <b>H</b> N <b>R</b> - <b>K</b> W <b>D</b> A <b>Q</b> L <b>S</b> R                                       | Nup82     |           | 541   | 587   | 48.4     |                                                           |
| IV <b>K</b> A <b>Q</b> T <b>L</b> G <b>V</b> SI <b>H</b> N <b>R</b> -QL <b>Q</b> ST <b>C</b> K <b>I</b> IS <b>K</b>                                     | Nup82     |           | 541   | 569   | 36.7     |                                                           |
| IV <b>K</b> A <b>Q</b> T <b>L</b> G <b>V</b> SI <b>H</b> N <b>R</b> -QL <b>Q</b> ST <b>C</b> K <b>I</b> IS <b>K</b> <sup>^</sup> DD <b>D</b> L <b>R</b> | Nup82     |           | 541   | 569   | 38.6     | Missed-cleavage derivative to previous peptide            |
| QL <b>Q</b> ST <b>C</b> K <b>I</b> IS <b>K</b> - <b>K</b> F <b>E</b> A <b>Q</b> N <b>K</b>                                                              | Nup82     |           | 569   | 580   | 38.7     |                                                           |



Table S3. **Cross-links identified within the Nup82 complex using DSS** (Continued)

| Peptide                                                                                      | Protein 1 | Protein 2 | AA 1 | AA 2 | ld score | Comment                                        |
|----------------------------------------------------------------------------------------------|-----------|-----------|------|------|----------|------------------------------------------------|
| QLQSTCK <b>IISK</b> -KFEAQNKK                                                                | Nup82     |           | 569  | 586  | 26.2     |                                                |
| IISKDDDLR-R <b>KFEAQN</b> K                                                                  | Nup82     |           | 573  | 580  | 25.2     |                                                |
| IISKDDDLR <sup>^</sup> R-KFEAQN <b>K</b>                                                     | Nup82     |           | 573  | 580  | 41.9     | Missed-cleavage derivative to previous peptide |
| IISKDDDLR <sup>^</sup> R-KFEAQN <b>K</b> <sup>^</sup> K                                      | Nup82     |           | 573  | 580  | 28.9     | Missed-cleavage derivative to previous peptide |
| QLQSTCK <sup>^</sup> IISKDDDLR-R <b>KFEAQN</b> K                                             | Nup82     |           | 573  | 580  | 31.6     | Missed-cleavage derivative to previous peptide |
| IISKDDDLRR-KFEAQN <b>KK</b>                                                                  | Nup82     |           | 573  | 586  | 29.4     |                                                |
| IISKDDDLRR-K <b>WDAQLSR</b>                                                                  | Nup82     |           | 573  | 587  | 38.3     |                                                |
| KFEAQN <b>KK</b> - <b>KMLEIDSK</b>                                                           | Nup82     |           | 586  | 685  | 25.2     |                                                |
| <b>KWDAQLSR</b> -FEAQN <b>KK</b>                                                             | Nup82     |           | 587  | 586  | 36.6     |                                                |
| FEAQN <b>K</b> <sup>^</sup> <b>KWDAQLSR</b> -KFEAQN <b>K</b> <sup>^</sup> K                  | Nup82     |           | 587  | 586  | 26.5     | Missed-cleavage derivative to previous peptide |
| <b>KWDAQLSR</b> -FS <b>KLSK</b>                                                              | Nup82     |           | 587  | 604  | 40.0     |                                                |
| <b>KWDAQLSR</b> - <b>KFEAQN</b> K                                                            | Nup82     |           | 587  | 580  | 42.4     |                                                |
| <b>KWDAQLSR</b> -R <sup>^</sup> <b>KFEAQN</b> K                                              | Nup82     |           | 587  | 580  | 35.1     | Missed-cleavage derivative to previous peptide |
| <b>KLSQIAESNK</b> -FS <b>KLSK</b>                                                            | Nup82     |           | 608  | 604  | 40.6     |                                                |
| <b>KLSQIAESNK</b> <sup>^</sup> FK-FS <b>KLSK</b>                                             | Nup82     |           | 608  | 604  | 41.9     | Missed-cleavage derivative to previous peptide |
| <b>KISHGEMK</b> -WF <b>KEIR</b>                                                              | Nup82     |           | 622  | 632  | 30.3     |                                                |
| IEAETIKVD <b>KK</b> -FG <b>KVDIGK</b>                                                        | Nup82     |           | 671  | 269  | 37.3     |                                                |
| IEAETIKVD <b>KK</b> -FS <b>KLSK</b>                                                          | Nup82     |           | 671  | 604  | 28.7     |                                                |
| IEAETIKVD <b>KK</b> - <b>KFEAQN</b> K                                                        | Nup82     |           | 671  | 580  | 28.5     |                                                |
| IEAETIKVD <b>KK</b> - <b>KMLEIDSK</b>                                                        | Nup82     |           | 671  | 685  | 35.4     |                                                |
| IEAETIKVD <b>KK</b> - <b>KWDAQLSR</b>                                                        | Nup82     |           | 671  | 587  | 37.2     |                                                |
| IEAETIKVD <b>K</b> - <b>KSQNEWDEL</b> R                                                      | Nup82     |           | 671  | 675  | 38.3     |                                                |
| SELTR <sup>^</sup> IEAETIKVD <b>K</b> - <b>KSQNEWDEL</b> R <b>K</b>                          | Nup82     |           | 671  | 675  | 35.0     | Missed-cleavage derivative to previous peptide |
| IEAETIKVD <b>K</b> - <b>KSQNEWDEL</b> R <sup>^</sup> K                                       | Nup82     |           | 671  | 675  | 42.0     | Missed-cleavage derivative to previous peptide |
| IEAETIKVD <b>KK</b> - <b>KFEAQN</b> K                                                        | Nup82     |           | 674  | 580  | 34.4     |                                                |
| IEAETIKVD <b>KK</b> - <b>KMLEIDSK</b>                                                        | Nup82     |           | 674  | 685  | 31.7     |                                                |
| IEAETIKVD <b>KK</b> - <b>KWDAQLSR</b>                                                        | Nup82     |           | 674  | 587  | 28.3     |                                                |
| <b>KSQNEWDEL</b> R- <b>KMLEIDSK</b>                                                          | Nup82     |           | 675  | 685  | 38.2     |                                                |
| <b>KSQNEWDEL</b> R <b>K</b> - <b>MLEIDSK</b> I <b>K</b>                                      | Nup82     |           | 675  | 692  | 29.5     |                                                |
| TQGS <b>DYKD</b> H <b>DGDYK</b> DDDD <b>K</b> -<br>IV <b>K</b> A <b>QTLG</b> VS <b>IHN</b> R | Nup82     |           | 718  | 541  | 34.2     |                                                |
| TQGS <b>DYKD</b> H <b>DGDYK</b> DDDD <b>K</b> -FEAQN <b>KK</b>                               | Nup82     |           | 725  | 586  | 26.7     |                                                |

Cross-linked peptides are separated by hyphens; cross-linked lysine residues of the peptides are in bold. <sup>^</sup> indicates a missed-cleavage derivative of previous peptide, which comprises an independent experimental evidence. ld, linear discriminant.

Table S4. **Cross-links identified within the Nup82 complex using DSG**

| Peptide                          | Protein 1 | Protein 2 | AA 1  | AA 2  | ld score | Comment                                        |
|----------------------------------|-----------|-----------|-------|-------|----------|------------------------------------------------|
| KTEESSTGKSTADV K-KQLDVK          | Nsp1      | Dyn2      | 607   | 47    | 24.9     |                                                |
| KTEESSTGKSTADV K-FGKVDIQK        | Nsp1      | Nup82     | 607   | 269   | 27.6     |                                                |
| KTEESSTGK-IVKAQTLGVSIHNR         | Nsp1      | Nup82     | 541   | 599   | 36.6     |                                                |
| KTEESSTGK^STADV K-IVKAQTLGVSIHNR | Nsp1      | Nup82     | 599   | 541   | 28.5     | Missed-cleavage derivative to previous peptide |
| LNSKPVELKPVSLDNK-IVKAQTLGVSIHNR  | Nsp1      | Nup82     | 623   | 541   | 29.7     |                                                |
| LNSKPVELKPVSLDNK-IVKAQTLGVSIHNR  | Nsp1      | Nup82     | 628   | 541   | 28.2     |                                                |
| KTEESSTGKSTADV K-QLGSTCKIISK     | Nsp1      | Nup82     | 607   | 569   | 25.3     |                                                |
| DNEKKTEESSTGK-KFEAQNK            | Nsp1      | Nup82     | 598   | 580   | 28.2     |                                                |
| LNSKPVELKPVSLDNK-QLKEYYTSAK      | Nsp1      | Nup159    | 623   | 1,191 | 27.6     |                                                |
| QINSIKK-EIKLLR                   | Nsp1      | Nup159    | 822   | 1,400 | 28.0     |                                                |
| NMDTFFTDQSSIVLVR-KR-KVLFHPK      | Nup159    | Nup82     | 1,249 | 129   | 25.3     |                                                |
| DGLLKEIK-FGKVDIQK                | Nup159    | Nup82     | 1,397 | 269   | 25.4     |                                                |
| LQLEEKGK-FGKVDIQK                | Nup159    | Nup82     | 1,414 | 269   | 25.8     |                                                |
| LQLEEKGK^K-FGKVDIQK              | Nup159    | Nup82     | 1,414 | 269   | 28.5     | Missed-cleavage derivative to previous peptide |
| EKVTDYVRK-KFEAQNK                | Nup159    | Nup82     | 1,294 | 580   | 29.4     |                                                |
| KASSFDASSITK-KFEAQNK             | Nup159    | Nup82     | 1,417 | 580   | 28.5     |                                                |
| QLKEYYTSAK-KTEESSTGK             | Nup159    | Nsp1      | 1,191 | 599   | 24.5     |                                                |
| IVKAQTLGVSIHNR-DALDKYQLER        | Nup82     | Dyn2      | 541   | 34    | 26.5     |                                                |
| IVKAQTLGVSIHNR-KQLDVK            | Nup82     | Dyn2      | 541   | 47    | 29.8     |                                                |
| IVKAQTLGVSIHNR-DNEKKTEESSTGK     | Nup82     | Nsp1      | 541   | 598   | 31.0     |                                                |
| IVKAQTLGVSIHNR-DNEK^KTEESSTGK    | Nup82     | Nsp1      | 541   | 599   | 32.2     | Missed-cleavage derivative to previous peptide |
| IVKAQTLGVSIHNR-TEESSTGKSTADV K   | Nup82     | Nsp1      | 541   | 607   | 25.6     |                                                |
| IVKAQTLGVSIHNR-K^TEESSTGKSTADV K | Nup82     | Nsp1      | 541   | 607   | 37.5     | Missed-cleavage derivative to previous peptide |
| IVKAQTLGVSIHNR-STADV KSSDSLK     | Nup82     | Nsp1      | 541   | 613   | 33.9     |                                                |
| IVKAQTLGVSIHNR-KINSWDQVVLK       | Nup82     | Nsp1      | 541   | 661   | 27.9     |                                                |
| FGKVDIQK-QINSIKK                 | Nup82     | Nsp1      | 269   | 822   | 26.3     |                                                |
| IVKAQTLGVSIHNR-QINSIKK           | Nup82     | Nsp1      | 541   | 822   | 28.3     |                                                |
| IVKAQTLGVSIHNR-QLKEYYTSAK        | Nup82     | Nup159    | 541   | 1,191 | 31.1     |                                                |
| IVKAQTLGVSIHNR-EKVTDYVR          | Nup82     | Nup159    | 541   | 1,294 | 32.1     |                                                |
| IVKAQTLGVSIHNR-EKVTDYVR^K        | Nup82     | Nup159    | 541   | 1,294 | 36.9     | Missed-cleavage derivative to previous peptide |
| FGKVDIQK-MQKTLR                  | Nup82     | Nup159    | 269   | 1,343 | 37.1     |                                                |
| FGKVDIQK^EYR-MQKTLR              | Nup82     | Nup159    | 269   | 1,343 | 31.5     | Missed-cleavage derivative to previous peptide |
| IVKAQTLGVSIHNR-MQKTLR            | Nup82     | Nup159    | 541   | 1,343 | 37.2     |                                                |
| IISKDDLR-MQKTLR                  | Nup82     | Nup159    | 573   | 1,343 | 24.8     |                                                |
| KFEAQNK-MQKTLR                   | Nup82     | Nup159    | 580   | 1,343 | 27.2     |                                                |
| KFEAQNK^K-MQKTLR                 | Nup82     | Nup159    | 580   | 1,343 | 26.3     | Missed-cleavage derivative to previous peptide |
| KWDAQLSR-MQKTLR                  | Nup82     | Nup159    | 587   | 1,343 | 26.7     |                                                |
| FSKLSK-MQKTLR                    | Nup82     | Nup159    | 604   | 1,343 | 25.9     |                                                |
| IVKAQTLGVSIHNR-QKLFVSAK          | Nup82     | Nup159    | 541   | 1,348 | 32.7     |                                                |
| IVKAQTLGVSIHNR-DGLLKEIK          | Nup82     | Nup159    | 541   | 1,397 | 30.2     |                                                |
| FGKVDIQK-EIKLLR                  | Nup82     | Nup159    | 269   | 1,400 | 29.2     |                                                |
| IVKAQTLGVSIHNR-EIKLLR            | Nup82     | Nup159    | 541   | 1,400 | 31.      |                                                |
| NVIKQLQFVSK-LQLEEKGK             | Nup82     | Nup159    | 251   | 1,414 | 26.4     |                                                |
| IVKAQTLGVSIHNR-LQLEEKGK          | Nup82     | Nup159    | 541   | 1,414 | 27.8     |                                                |
| TQGS DYKDHDGDYKDDDDK-LQLEEKGKK   | Nup82     | Nup159    | 718   | 1,414 | 27.3     |                                                |
| IVKAQTLGVSIHNR-KQIGDFFK          | Nup82     | Nup159    | 541   | 1,447 | 32.5     |                                                |
| DALDKYQLER-KQLDVK                | Dyn2      |           | 34    | 47    | 31.9     |                                                |
| DALDKYQLER-LKEDILTISK            | Dyn2      |           | 34    | 21    | 27.5     |                                                |
| STADV KSSDSLK-KTEESSTGK          | Nsp1      |           | 613   | 599   | 26.5     |                                                |
| LNSKPVELKPVSLDNK-STADV KSSDSLK   | Nsp1      |           | 623   | 613   | 26.4     |                                                |
| EKVTDYVR-MQKTLR                  | Nup159    |           | 1,294 | 1,343 | 26.7     |                                                |

Table S4. **Cross-links identified within the Nup82 complex using DSG** (Continued)

| Peptide                                  | Protein 1 | Protein 2 | AA 1  | AA 2  | ld score | Comment                                        |
|------------------------------------------|-----------|-----------|-------|-------|----------|------------------------------------------------|
| EKVTDYVR <sup>^</sup> K-MQKTLR           | Nup159    |           | 1,294 | 1,343 | 28.4     | Missed-cleavage derivative to previous peptide |
| QKLFVDSAK-MQKTLR                         | Nup159    |           | 1,348 | 1,343 | 31.7     |                                                |
| LFTVKNK-MQKTLR                           | Nup159    |           | 1,372 | 1,343 | 25.5     |                                                |
| RLDDNPLVAKLAK-LFTVKNK                    | Nup159    |           | 1,384 | 1,372 | 29.2     |                                                |
| LDDNPLVAKLAK-EIKLLR                      | Nup159    |           | 1,384 | 1,400 | 27.7     |                                                |
| LDDNPLVAKLAK-MQKTLR                      | Nup159    |           | 1,384 | 1,343 | 25.8     |                                                |
| LDDNPLVAKLAK-DGLLKEIK                    | Nup159    |           | 1,384 | 1,397 | 24.8     |                                                |
| DGLLKEIK-MQKTLR                          | Nup159    |           | 1,397 | 1,343 | 25.5     |                                                |
| DGLLKEIK-EIKLLR                          | Nup159    |           | 1,397 | 1,400 | 25.1     |                                                |
| LQLEEKGK-EIKLLR                          | Nup159    |           | 1,414 | 1,400 | 32.0     |                                                |
| EIKLLR <sup>^</sup> EQVSR-LQLEEKGK       | Nup159    |           | 1,400 | 1,414 | 26.9     | Missed-cleavage derivative to previous peptide |
| EIKLLREQVSR-MQKTLR                       | Nup159    |           | 1,400 | 1,343 | 24.6     |                                                |
| LQLEEKGK-MQKTLR                          | Nup159    |           | 1,414 | 1,343 | 28.5     |                                                |
| LQLEEKGKK-MQKTLR                         | Nup159    |           | 1,416 | 1,343 | 25.9     |                                                |
| KASSFDASSSITK-LQLEEKGK                   | Nup159    |           | 1,417 | 1,414 | 32.9     |                                                |
| KASSFDASSSITK-MQKTLR                     | Nup159    |           | 1,417 | 1,343 | 26.1     |                                                |
| DMKGFK-MQKTLR                            | Nup159    |           | 1,432 | 1,343 | 27.0     |                                                |
| KQIGDFFK-LQLEEKGK                        | Nup159    |           | 1,447 | 1,414 | 28.6     |                                                |
| KQIGDFFK-EIKLLR                          | Nup159    |           | 1,447 | 1,400 | 27.3     |                                                |
| KQIGDFFK-MQKTLR                          | Nup159    |           | 1,447 | 1,343 | 25.5     |                                                |
| FGKVDIQK-KVLFHPK                         | Nup82     |           | 269   | 129   | 34.4     |                                                |
| FGKVDIQK-KWDAQLSR                        | Nup82     |           | 269   | 587   | 25.9     |                                                |
| EIKSLITLPEQLGK-KVLFHPK                   | Nup82     |           | 361   | 129   | 26.1     |                                                |
| IVKAQTLGVSIHNR-KWDAQLSR                  | Nup82     |           | 541   | 587   | 39.5     |                                                |
| IVKAQTLGVSIHNR-FSKLSK                    | Nup82     |           | 541   | 604   | 38.5     |                                                |
| IVKAQTLGVSIHNR-FGKVDIQK                  | Nup82     |           | 541   | 269   | 37.8     |                                                |
| IVKAQTLGVSIHNR-IEAETIKVDKK               | Nup82     |           | 541   | 674   | 33.1     |                                                |
| IVKAQTLGVSIHNR-KFEAQNK                   | Nup82     |           | 541   | 580   | 32.2     |                                                |
| IVKAQTLGVSIHNR-R <sup>^</sup> KFEAQNK    | Nup82     |           | 541   | 580   | 29.2     | Missed-cleavage derivative to previous peptide |
| IVKAQTLGVSIHNR-KVLFHPK                   | Nup82     |           | 541   | 129   | 31.8     |                                                |
| IVKAQTLGVSIHNR-KMLEIDSK                  | Nup82     |           | 541   | 685   | 31.3     |                                                |
| IVKAQTLGVSIHNR-IISKDDDLR                 | Nup82     |           | 541   | 573   | 28.0     |                                                |
| IVKAQTLGVSIHNR-IISKDDDLR <sup>^</sup> R- | Nup82     |           | 541   | 573   | 30.0     | Missed-cleavage derivative to previous peptide |
| IVKAQTLGVSIHNR-IVKAQTLGVSIHNR            | Nup82     |           | 541   | 541   | 28.0     | Homodimeric peptide topology                   |
| IVKAQTLGVSIHNR-QLQSTCKIISK               | Nup82     |           | 541   | 569   | 28.0     |                                                |
| IVKAQTLGVSIHNR-LSQIAESNKFK               | Nup82     |           | 541   | 617   | 27.7     |                                                |
| IVKAQTLGVSIHNR-IEAETIKVDKK               | Nup82     |           | 541   | 671   | 26.6     |                                                |
| IVKAQTLGVSIHNR-KFEAQNKK                  | Nup82     |           | 541   | 586   | 26.1     |                                                |
| QLQSTCKIISK-KWDAQLSR                     | Nup82     |           | 569   | 587   | 29.1     |                                                |
| QLQSTCKIISKDDDLR-IVKAQTLGVSIHNR          | Nup82     |           | 569   | 541   | 26.3     |                                                |
| QLQSTCKIISK-KFEAQNK                      | Nup82     |           | 569   | 580   | 25.8     |                                                |
| IISKDDDLR-KFEAQNK                        | Nup82     |           | 573   | 580   | 29.6     |                                                |
| IISKDDDLR-FSKLSK                         | Nup82     |           | 573   | 604   | 27.0     |                                                |
| IISKDDDLR-KWDAQLSR                       | Nup82     |           | 573   | 587   | 25.7     |                                                |
| IISKDDDLR <sup>^</sup> R-KWDAQLSR        | Nup82     |           | 573   | 587   | 25.5     | Missed-cleavage derivative to previous peptide |
| KFEAQNK-FSKLSK                           | Nup82     |           | 580   | 604   | 32.4     |                                                |
| KFEAQNK-KFEAQNK                          | Nup82     |           | 580   | 580   | 24.9     | Homodimeric peptide topology                   |
| KFEAQNK-KFSKLSK                          | Nup82     |           | 586   | 604   | 25.9     |                                                |
| KWDAQLSR-R <sup>^</sup> KFEAQNK          | Nup82     |           | 587   | 580   | 26.3     | Missed-cleavage derivative to previous peptide |
| KWDAQLSR-KFEAQNK                         | Nup82     |           | 587   | 580   | 33.0     |                                                |
| KWDAQLSR-FSKLSK                          | Nup82     |           | 587   | 604   | 29.4     |                                                |
| FSKLSK-KFEAQNK                           | Nup82     |           | 604   | 580   | 28.8     |                                                |
| KLQIAESNK-FSKLSK                         | Nup82     |           | 608   | 604   | 35.2     |                                                |

Table S4. **Cross-links identified within the Nup82 complex using DSG** (Continued)

| Peptide                                 | Protein 1 | Protein 2 | AA 1 | AA 2 | ld score | Comment                                        |
|-----------------------------------------|-----------|-----------|------|------|----------|------------------------------------------------|
| KLSQIAESNK <sup>^</sup> FK-FSKLSK       | Nup82     |           | 608  | 604  | 31.3     | Missed-cleavage derivative to previous peptide |
| LSQIAESNKFK-EKKISHGEMK                  | Nup82     |           | 617  | 621  | 25.7     |                                                |
| LSQIAESNKFK-KISHGEMK                    | Nup82     |           | 617  | 622  | 25.4     |                                                |
| KISHGEMK-WFKEIR                         | Nup82     |           | 622  | 632  | 28.2     |                                                |
| IEAETIKVDK-KSQNEWDELK                   | Nup82     |           | 671  | 675  | 27.5     |                                                |
| SELTRIEAETIKVDK-KSQNEWDELK <sup>^</sup> | Nup82     |           | 671  | 675  | 29.5     | Missed-cleavage derivative to previous peptide |
| IEAETIKVDK-KMLEIDSK                     | Nup82     |           | 671  | 685  | 26.5     |                                                |
| KSQNEWDELK-KMLEIDSK                     | Nup82     |           | 675  | 685  | 35.8     |                                                |

Cross-linked peptides are separated by hyphens; cross-linked lysine residues of the peptides are in bold. <sup>^</sup> indicates missed-cleavage derivative of previous peptide, which comprises an independent experimental evidence. ld, linear discriminant.

Table S5. **Protein stoichiometry of the Nup82 complex using SRM-MS**

| Protein | Peptide      | Early gel filtration fraction      |                                    | Apex gel filtration fraction       |                                    |
|---------|--------------|------------------------------------|------------------------------------|------------------------------------|------------------------------------|
|         |              | Intensity per peptide <sup>a</sup> | Abundance per protein <sup>b</sup> | Intensity per peptide <sup>a</sup> | Abundance per protein <sup>b</sup> |
| Nsp1    | IDQSLQYIER   | 0.24                               | 3.08                               | 7.66                               | 1.78                               |
| Nsp1    | ILNSHFDALR   | 0.35                               | –                                  | 8.51                               | –                                  |
| Nup82   | AQTLGVSIIHNR | 0.22                               | 2.02                               | 13.19                              | 2.39                               |
| Nup82   | SLQQDLSYK    | 0.17                               | –                                  | 8.54                               | –                                  |
| Nup159  | DLSTHQFR     | 0.21                               | 2.00                               | 9.16                               | 2.00                               |
| Nup159  | SINNLYTWR    | 0.18                               | –                                  | 8.98                               | –                                  |
| Dyn2    | NFGSYVTHEK   | 0.70                               | 9.31                               | 35.27                              | 10.56                              |
| Dyn2    | YGNTWHVIVGK  | 1.09                               | –                                  | 60.49                              | –                                  |

<sup>a</sup>Summed intensity of the five most intense transitions per peptide.

<sup>b</sup>Peptide intensities corresponding to the same protein were averaged and normalized to the Nup159 signal, resulting in the final stoichiometric read out per protein.

## References

- Del Priore, V., C. Heath, C. Snay, A. MacMillan, L. Gorsch, S. Dagher, and C. Cole. 1997. A structure/function analysis of Rat7p/Nup159p, an essential nucleoporin of *Saccharomyces cerevisiae*. *J. Cell Sci.* 110:2987–2999.
- Gorsch, L.C., T.C. Dockendorff, and C.N. Cole. 1995. A conditional allele of the novel repeat-containing yeast nucleoporin RAT7/NUP159 causes both rapid cessation of mRNA export and reversible clustering of nuclear pore complexes. *J. Cell Biol.* 129:939–955. <http://dx.doi.org/10.1083/jcb.129.4.939>
- Grandi, P., S. Emig, C. Weise, F. Hucho, T. Pohl, and E.C. Hurt. 1995. A novel nuclear pore protein Nup82p which specifically binds to a fraction of Nsp1p. *J. Cell Biol.* 130:1263–1273. <http://dx.doi.org/10.1083/jcb.130.6.1263>
- Kraemer, D.M., C. Strambio-de-Castillia, G. Blobel, and M.P. Rout. 1995. The essential yeast nucleoporin NUP159 is located on the cytoplasmic side of the nuclear pore complex and serves in karyopherin-mediated binding of transport substrate. *J. Biol. Chem.* 270:19017–19021. <http://dx.doi.org/10.1074/jbc.270.32.19017>
- Nehrbass, U., H. Kern, A. Mutvei, H. Horstmann, B. Marshallsay, and E.C. Hurt. 1990. NSP1: a yeast nuclear envelope protein localized at the nuclear pores exerts its essential function by its carboxy-terminal domain. *Cell.* 61:979–989. [http://dx.doi.org/10.1016/0092-8674\(90\)90063-K](http://dx.doi.org/10.1016/0092-8674(90)90063-K)
- Stelter, P., R. Kunze, D. Flemming, D. Höpfner, M. Diepholz, P. Philippson, B. Böttcher, and E. Hurt. 2007. Molecular basis for the functional interaction of dynein light chain with the nuclear-pore complex. *Nat. Cell Biol.* 9:788–796. <http://dx.doi.org/10.1038/ncb1604>
